# Supplementary material for: Sensitive SERS assay for glyphosate based on the prevention of l-cysteine inhibition of a Au–Pt nanozyme
Source: Royal Society of Chemistry journal article supplement (doi:10.1039/d0an01919d), 2020-11-13
Supplement: d0an01919d1.pdf [file d0an01919d1.pdf]

## **Sensitive SERS Assay for Glyphosate Based on Removal of L-cysteine Inhibition of Au-Pt Nanozyme**

Jun Ma,<sup>a</sup> Gege Feng,<sup>a</sup> Ying Ying,<sup>a</sup> Yong Shao,<sup>a</sup> Yongxin She,<sup>\*a</sup> Lufei Zheng,<sup>\*a</sup> A. M.

Abd El-Aty<sup>bc</sup> and Jing Wang<sup>\*a</sup>

<sup>a</sup>Institute of Quality Standard and Testing Technology for Agro-Products, Chinese Academy of Agricultural Sciences, Beijing 100081, P.R China

<sup>b</sup>Department of Pharmacology, Faculty of Veterinary Medicine, Cairo University, 12211-Giza, Egypt

<sup>c</sup>Department of Medical Pharmacology, Medical Faculty, Ataturk University, 25240-Erzurum, Turkey

### **LC-MS/MS conditions**

LC-MS/MS analysis was carried out using a Nexera LC system with an LCMS-8050 triple quadrupole-mass spectrometer (Shimadzu, Kyoto, Japan).

Agilent ZORBAX RX-SIL column (150 × 2.1 mm, 5 μm);

The injection volume: 1.0 μL;

The mobile phase: A: 0.5% formic acid solution (90%); B: acetonitrile (10%);

The flow rate: 0.3 mL min<sup>-1</sup>

ESI interface voltage: 3.0 kV;

Interface temperature: 300 °C;

Desolation line temperature: 200 °C;

Heat block temperature: 400 °C;

Collision gas: 270 kPa.

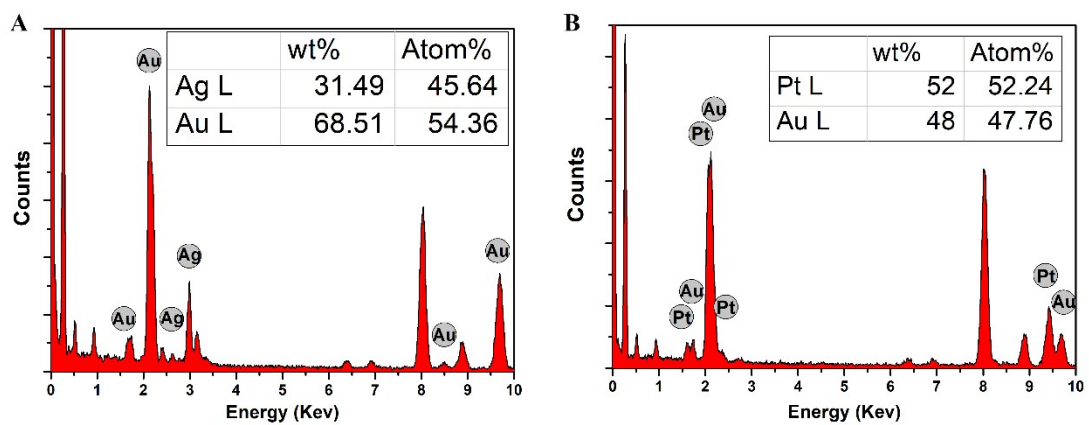

**Figure S1.** EDX profile of Au-Ag nanochain (A) and Au-Pt nanozyme (B).

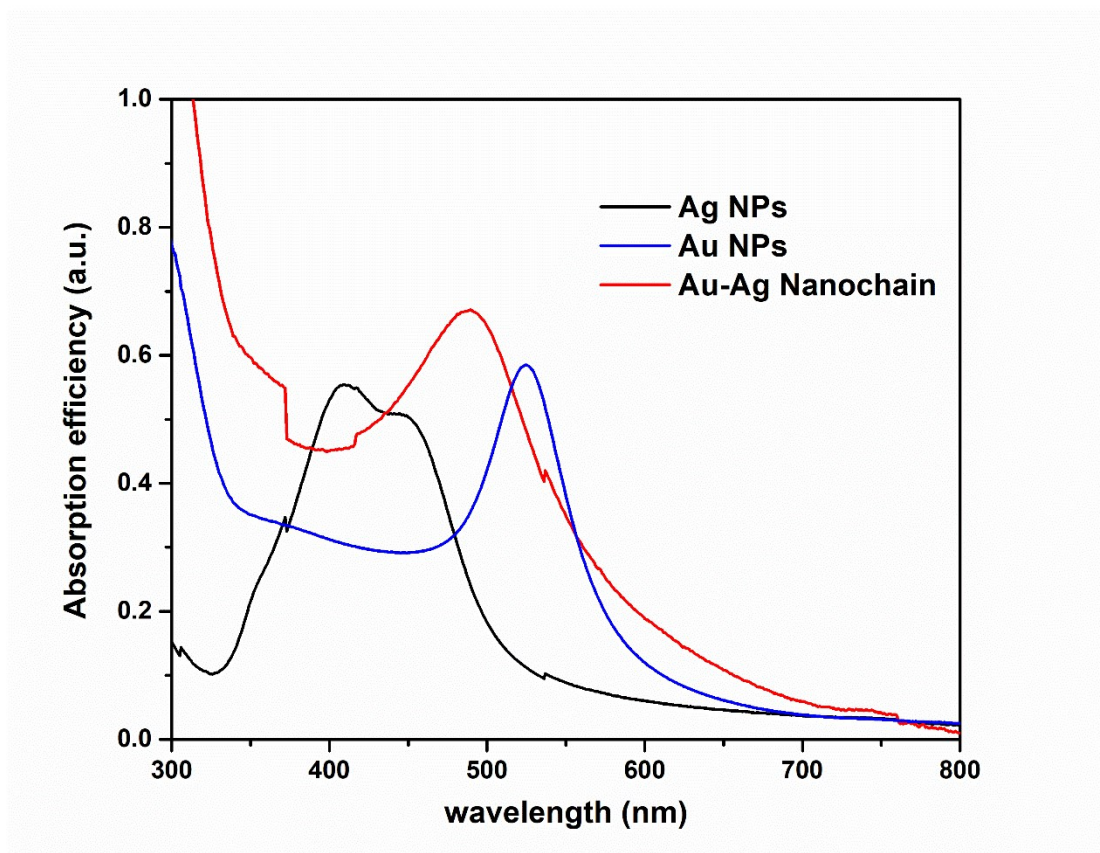

**Figure S2.** UV-vis spectra of Ag NPs, Au NPs, and Au-Ag nanochain

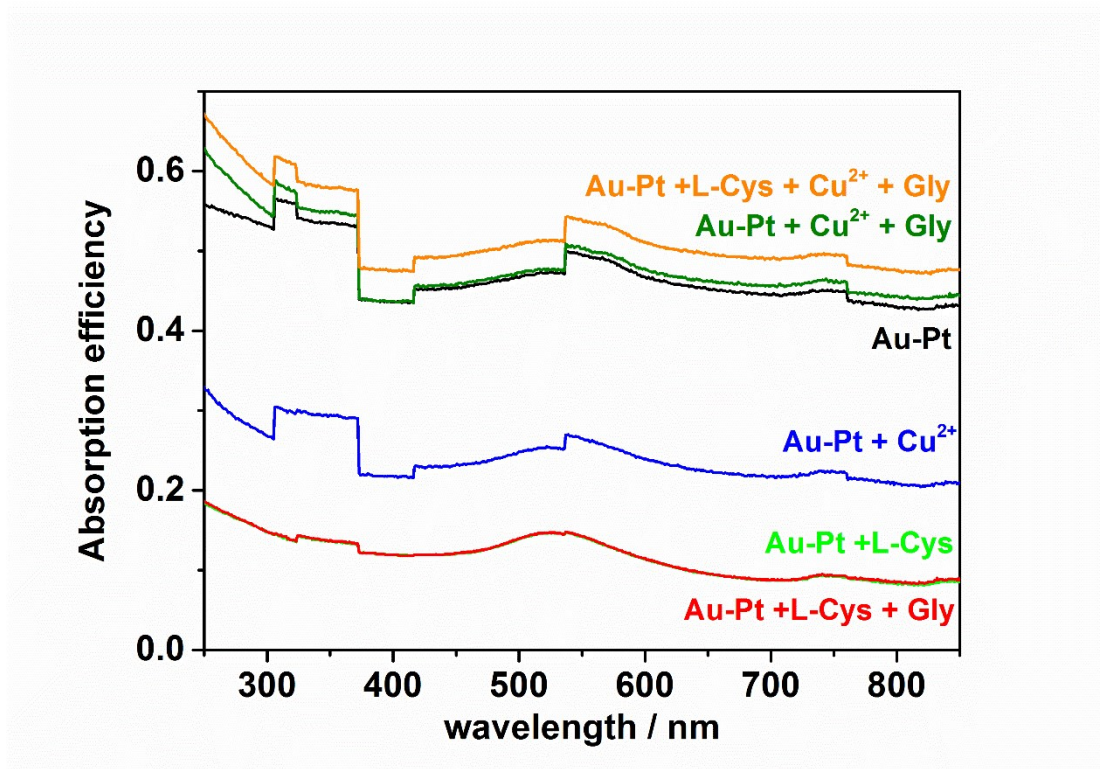

Figure S3. UV-vis spectra of a combination of different components.

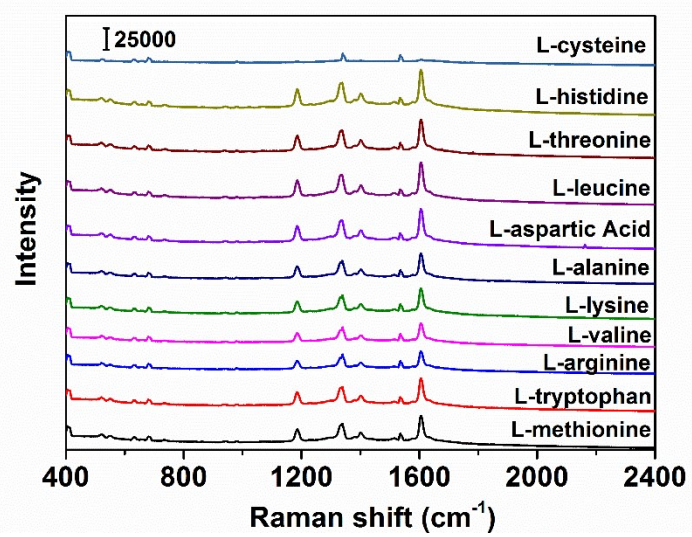

**Figure S4.** Selectivity of the proposed method for Gly against other amino acids

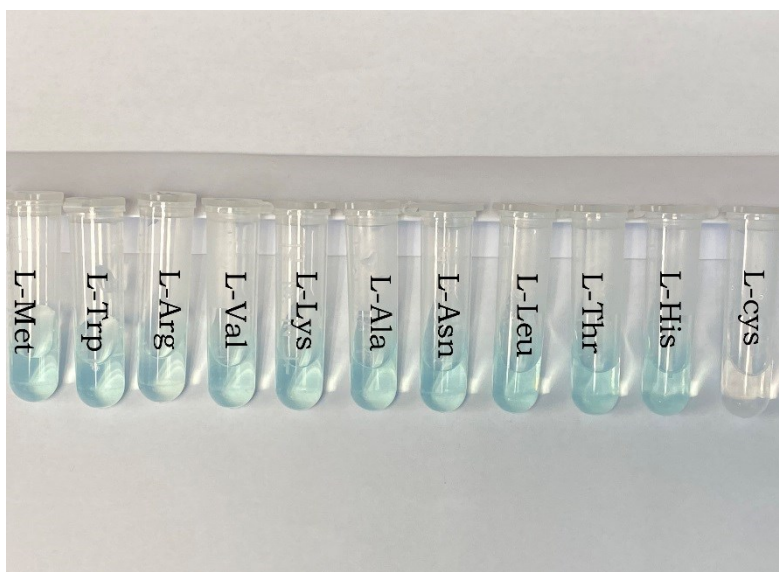

**Figure S5.** Corresponding photographs of the color change for Figure S4.

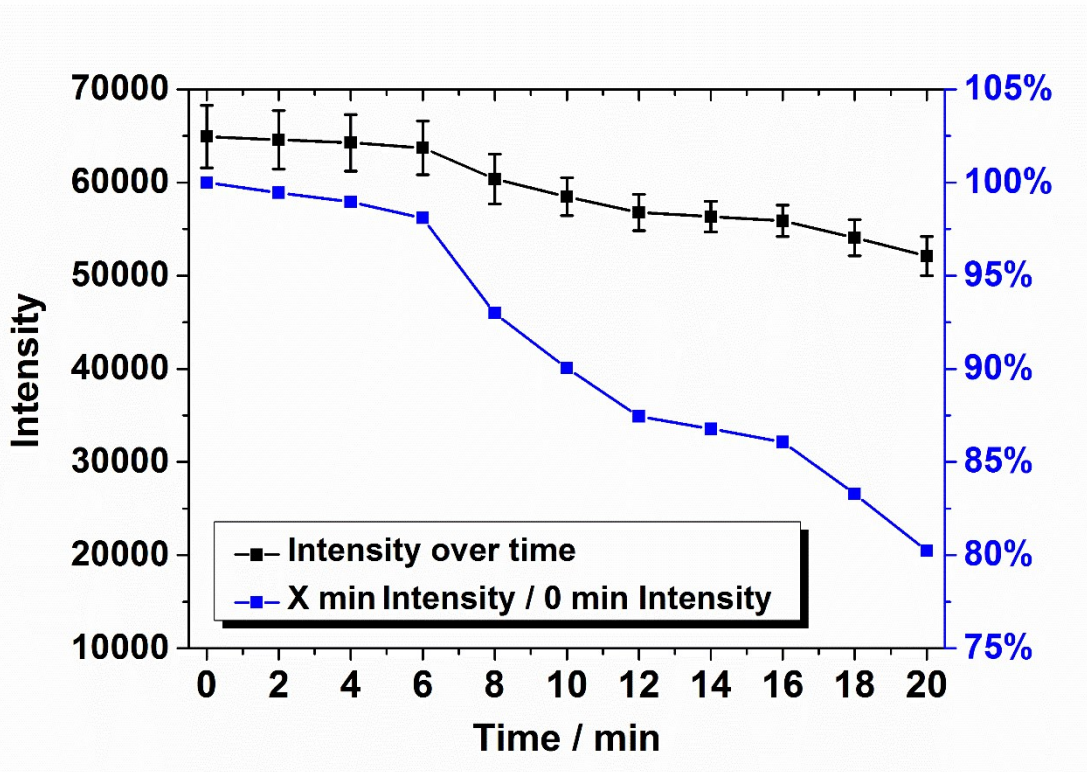

Figure S6. Time response experiment of SERS measurement.



**Table S1 Main SERS Band Assignments of oxTMB**

**Tentative assignments of SERS bands for oxTMB complex with 785 nm laser excitation.**

| <b>Raman Shift (cm<sup>-1</sup>)</b> | <b>Band assignment</b>                       |
|--------------------------------------|----------------------------------------------|
| <b>1191</b>                          | <b>CH<sub>3</sub> bending mode</b>           |
| <b>1336</b>                          | <b>Inter-ring C–C stretching mode</b>        |
| <b>1605</b>                          | <b>Ring stretching and C–H bending modes</b> |

**Table S2.** Comparative analysis among SERS detection methods of Gly

| <b>SERS substrate</b>                              | <b>Linear range<br/>(mg·L<sup>-1</sup>)</b> | <b>LOD<br/>(mg·L<sup>-1</sup>)</b> | <b>Application</b>   | <b>Reference</b> |
|----------------------------------------------------|---------------------------------------------|------------------------------------|----------------------|------------------|
| <b>Ag Nanoparticles</b>                            | <b>0.0168 - 16.8</b>                        | <b>0.0023</b>                      | <b>Natural water</b> | <b>25</b>        |
| <b>Cysteamine-modified<br/>gold nanoparticles</b>  | <b>0.001 - 1000</b>                         | <b>0.001</b>                       | <b>Plant leaves</b>  | <b>23</b>        |
| <b>Silver dendrites on Cu-<br/>grid bar</b>        | <b>0.845 - 169</b>                          | <b>0.845</b>                       | —————                | <b>22</b>        |
| <b><sup>100</sup>sCO-Au NPs</b>                    | <b>0.0001 - 0.1</b>                         | <b>0.0001</b>                      | <b>Beer</b>          | <b>24</b>        |
| <b>Citrate-stabilized silver<br/>nanoparticles</b> | —————                                       | <b>1.3</b>                         | <b>Water</b>         | <b>27</b>        |
| <b>Au-Ag nanochain</b>                             | <b>0.01 -1000</b>                           | <b>0.005</b>                       | <b>Tap water</b>     | <b>This work</b> |

**Table S3.** *m/z* ratio and the ion collision energy of glyphosate

| <b>No.</b> | <b>Compound</b>   | <b>Parent ion<br/>(<i>m/z</i>)</b> | <b>Product<br/>ion (<i>m/z</i>)</b> | <b>CE<br/>(V)</b> |
|------------|-------------------|------------------------------------|-------------------------------------|-------------------|
| <b>1</b>   | <b>Glyphosate</b> | <b>167.8</b>                       | <b>63.00</b>                        | <b>33.0</b>       |
|            |                   |                                    | <b>81.00</b>                        | <b>20.3</b>       |
|            |                   |                                    | <b>124.00</b>                       | <b>17.0</b>       |
|            |                   |                                    | <b>150.00</b>                       | <b>12.5</b>       |
